# Supplementary material
Source: PubMed Central journal article supplement (PMC4681512)
Supplement: NIHMS742709-supplement-Suppl_Table_9.pdf [file NIHMS742709-supplement-Suppl_Table_9.pdf]

**Supplementary Table IX. Transcriptional regulators inferred to be active in RTs, based on IPA analysis of downstream target gene expression, using genes dysregulated in all 3 RT groups compared to normal.**

| Upstream Regulator | Fold Change of Upstream Regulator* | Predicted Activation State | Activation z-score | P-value of overlap |
|--------------------|------------------------------------|----------------------------|--------------------|--------------------|
| <b>MYC</b>         |                                    | Activated                  | 5.71               | 1.60E-21           |
| <b>HGF</b>         |                                    | Activated                  | 4.91               | 2.43E-16           |
| <b>Vegf</b>        |                                    | Activated                  | 4.76               | 2.02E-17           |
| <b>TBX2</b>        |                                    | Activated                  | 4.43               | 3.10E-22           |
| <b>FOXO1</b>       |                                    | Activated                  | 3.94               | 2.18E-05           |
| <b>E2F1</b>        |                                    | Activated                  | 3.66               | 4.07E-22           |
| <b>FOXM1</b>       | 30.3                               | Activated                  | 3.50               | 8.41E-13           |
| <b>EP400</b>       |                                    | Activated                  | 3.43               | 1.65E-12           |
| <b>CCND1</b>       |                                    | Activated                  | 3.21               | 1.90E-16           |
| <b>EIF4E</b>       |                                    | Activated                  | 3.11               | 2.00E-03           |
| <b>E2F2</b>        |                                    | Activated                  | 2.83               | 1.13E-13           |
| <b>ERBB2</b>       |                                    | Activated                  | 2.74               | 1.79E-19           |
| <b>S100A6</b>      |                                    | Activated                  | 2.71               | 1.62E-10           |
| <b>CD24</b>        |                                    | Activated                  | 2.53               | 2.80E-04           |
| <b>CD40LG</b>      |                                    | Activated                  | 2.49               | 1.25E-02           |
| <b>MYCN</b>        |                                    | Activated                  | 2.48               | 5.33E-08           |
| <b>SATB1</b>       |                                    | Activated                  | 2.43               | 9.84E-02           |
| <b>Hdac</b>        |                                    | Activated                  | 2.37               | 1.92E-01           |
| <b>SMOC2</b>       |                                    | Activated                  | 2.24               | 5.17E-07           |
| <b>TFDP1</b>       |                                    | Activated                  | 2.21               | 5.07E-05           |
| <b>E2F3</b>        |                                    | Activated                  | 2.20               | 5.38E-15           |
| <b>E2f</b>         |                                    | Activated                  | 2.18               | 2.20E-13           |
| <b>ANGPT2</b>      |                                    | Activated                  | 2.06               | 7.30E-03           |
| <b>CD247</b>       |                                    | Activated                  | 2.00               | 1.31E-01           |
| <b>NFYA</b>        |                                    | Activated                  | 2.00               | 4.49E-04           |
| <b>AGA</b>         |                                    | Inhibited                  | -2.00              | 4.18E-06           |
| <b>SLC13A1</b>     |                                    | Inhibited                  | -2.00              | 3.08E-01           |
| <b>SMARCE1</b>     |                                    | Inhibited                  | -2.00              | 2.11E-04           |
| <b>HNF4A</b>       |                                    | Inhibited                  | -2.13              | 9.56E-06           |
| <b>IKBKB</b>       |                                    | Inhibited                  | -2.18              | 1.27E-03           |
| <b>SPI1</b>        |                                    | Inhibited                  | -2.20              | 9.95E-02           |
| <b>UXT</b>         |                                    | Inhibited                  | -2.22              | 1.96E-03           |

|                 |      |           |       |          |
|-----------------|------|-----------|-------|----------|
| <b>ESR2</b>     |      | Inhibited | -2.22 | 1.32E-01 |
| <b>PTEN</b>     |      | Inhibited | -2.39 | 5.52E-07 |
| <b>STAT5A</b>   |      | Inhibited | -2.41 | 1.78E-01 |
| <b>MXI1</b>     |      | Inhibited | -2.41 | 1.91E-06 |
| <b>FOXO3</b>    |      | Inhibited | -2.44 | 1.26E-04 |
| <b>ADCYAP1</b>  |      | Inhibited | -2.50 | 2.69E-02 |
| <b>TREM1</b>    |      | Inhibited | -2.50 | 5.40E-03 |
| <b>PPARG</b>    |      | Inhibited | -2.50 | 2.50E-02 |
| <b>TOB1</b>     |      | Inhibited | -2.53 | 7.85E-07 |
| <b>PPARGC1A</b> |      | Inhibited | -2.61 | 8.12E-02 |
| <b>TCF3</b>     | 4.47 | Inhibited | -2.75 | 2.46E-07 |
| <b>SMARCB1</b>  |      | Inhibited | -2.99 | 5.82E-10 |
| <b>BNIP3L</b>   |      | Inhibited | -3.15 | 3.85E-06 |
| <b>RBL2</b>     |      | Inhibited | -3.28 | 1.43E-08 |
| <b>CD28</b>     |      | Inhibited | -3.43 | 1.72E-05 |
| <b>Rb</b>       |      | Inhibited | -3.43 | 7.08E-13 |
| <b>KDM5B</b>    |      | Inhibited | -3.44 | 7.89E-16 |
| <b>RBL1</b>     |      | Inhibited | -3.59 | 6.52E-12 |
| <b>CDKN1A</b>   |      | Inhibited | -3.61 | 4.81E-40 |
| <b>IRGM</b>     |      | Inhibited | -3.74 | 1.79E-11 |
| <b>TP53</b>     | 20.2 | Inhibited | -3.95 | 2.92E-36 |
| <b>CDKN2A</b>   |      | Inhibited | -4.24 | 5.60E-21 |
| <b>RB1</b>      |      | Inhibited | -4.40 | 3.81E-19 |

\*Fold change shown if the upstream regulator was itself among the 610 dysregulated genes input to IPA
